# Supplementary material for: Hydrogen spillover on N-doped carbon coating improves the hydrogenation performance of nickel catalysts
Source: Royal Society of Chemistry journal article supplement (doi:10.1039/d3cy01472j), 2024-01-01
Supplement: d3cy01472j1.pdf [file d3cy01472j1.pdf]

## SUPPORTING INFORMATION

# Hydrogen Spillover in N-doped Carbon Coating Improves the Hydrogenation Activity of Nickel Catalysts

*Bruno H. Arpini,<sup>a</sup> Jhonatan L. Fiorio,<sup>b</sup> João V. F. da Costa,<sup>a</sup> Jan-Ole Joswig,<sup>b</sup> Liane M.  
Rossi<sup>\*a</sup>*

<sup>a</sup> Department of Fundamental Chemistry, Institute of Chemistry, University of São Paulo, Av. Prof. Lineu Prestes 781, São Paulo-SP 05508-000

<sup>b</sup> Theoretische Chemie, Technische Universität Dresden, 01062 Dresden, Germany

Hydrogen Spillover; Nickel; N-doped carbon; Hydrogenation; Nanomaterials

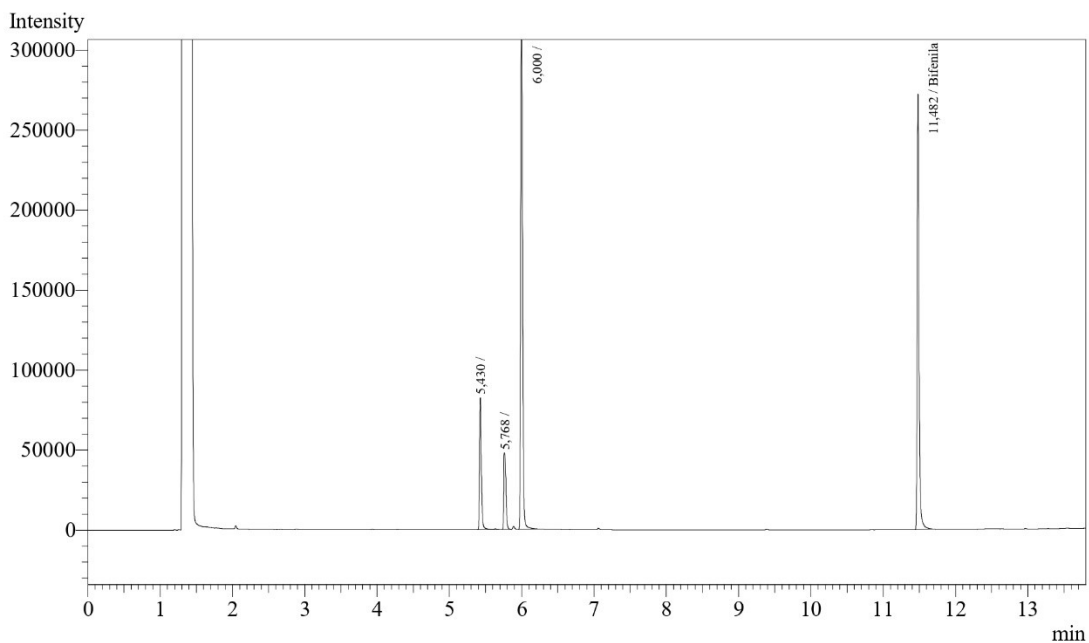

| Peak# | Ret. Time | Area    | Height | Conc. | Unit  | Mark | ID# | Cmpd Name                            |
|-------|-----------|---------|--------|-------|-------|------|-----|--------------------------------------|
| 1     | 5,430     | 141544  | 81187  | 0,472 | mmol. |      | 1   | 1-ethynyl-4-(trifluoromethyl)benzene |
| 2     | 5,768     | 81533   | 46777  | 0,000 |       | V    | 2   | 1-ethane-4-(trifluoromethyl)benzene  |
| 3     | 6,000     | 659075  | 384555 | 0,000 |       |      | 3   | 1-ethene-4-(trifluoromethyl)benzene  |
| 4     | 11,482    | 470790  | 267799 | 0,000 | mmol. |      | 4   | Bifenila                             |
| 5     |           |         |        |       |       |      |     |                                      |
| Total |           | 1352942 | 780318 |       |       |      |     |                                      |

**Figure S1.** Example of the GC data acquisition. Studied molecule in this case: 4-ethynyl- $\alpha,\alpha,\alpha$ -trifluorotoluene; biphenyl as internal standard. The first unnamed peak is the solvent: ethanol.

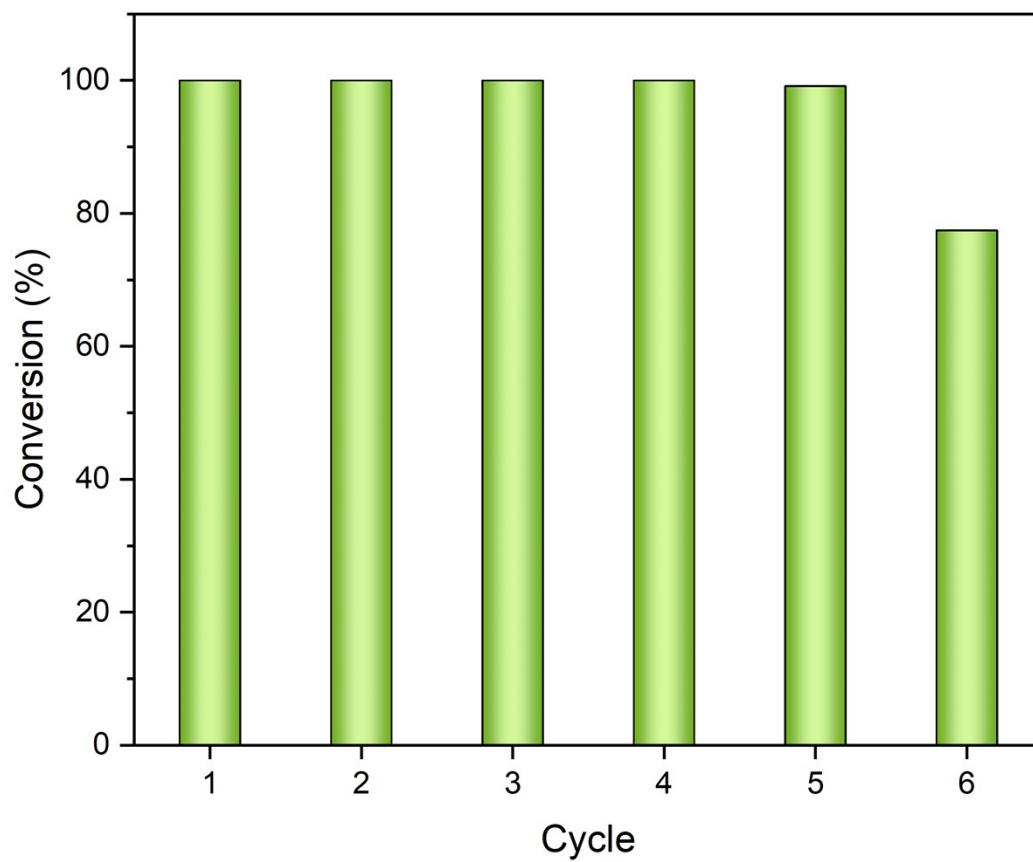

**Figure S2.** Recycling Ni5@NC/SiO<sub>2</sub> after 6 reactions, the conditions are: 80 °C, 250 min, 6 bar of H<sub>2(g)</sub>. In the 6 reactions, the hybrid catalyst was washed with EtOH.
